# Supplementary material for: Nonlinear phenotypic variation uncovers the emergence of heterosis in Arabidopsis thaliana
Source: PLoS Biol. 2019 Apr 24;17(4):e3000214. doi: 10.1371/journal.pbio.3000214 (PMC6481775; doi:10.1371/journal.pbio.3000214)
Supplement: S1 Table — (XLSX) [file pbio.3000214.s002.xlsx]

## Sheet: SummaryStatistics
S1 Table. Summary statistics of traits measured.
M: vegetative dry mass. SD: Standard deviation. Variance estimated by linear mixed-model, difference between hybrids and accessions tested by one-way ANOVA (NS: non significant)
	mean accessions	SD accessions	mean hybrids	SD hybrids	Variance explained by genotype (%)	Hybrids versus Accessions
M (mg)	314.039	288.934	318.271	320.723	93.5804	NS (P > 0.05)
Age at reproduction (days)	60.5794	19.757	63.9262	20.1411	85.364	NS (P > 0.05)
Growth rate (mg d-1)	9.04489	5.52885	8.65898	6.14054	79.7151	NS (P > 0.05)
Fruit number	152.176	63.6423	144.605	55.6197	89.4121	NS (P > 0.05)
